# Supplementary material
Source: ML conference proceedings conference paper supplement (https://openreview.net/forum?id=y8zhHLm7FsP)
Supplement: supplementary_material [file attachment]

# README

October 5, 2021

This code plots the MSE in  $P$  and records the relative error in gain and cost as produced by the EnKF.

The code is written in Python 3 and there are four files: `constants_enkf.py`, `enkf.py`, `enkf-time.py` `LQSys.py`. The steps for running the code are as follows:

1. In `constants_enkf.py`, set the desired variables as per the modelling and simulation parameters, see Table 1 and Table 2 respectively for location of these variables in the code.
2. Run `enkf.py`
3. To get the simulation times, run `enkf-time.py`

Table 1: Modelling parameters in `constants_enkf.py`

| Modelling parameter | Variable name in code | Line number in code |              |
|---------------------|-----------------------|---------------------|--------------|
|                     |                       | $d/2 = 1$           | $d/2 \geq 2$ |
| $C^\top C$          | <code>Q</code>        | 26                  | 43           |
| $R$                 | <code>R</code>        | 27                  | 44           |

Table 2: Simulation parameters in `constants_enkf.py`

| Modelling parameter                     | Variable name in code | Line number in code |
|-----------------------------------------|-----------------------|---------------------|
| Total simulation time ( $T$ )           | <code>T</code>        | 4                   |
| Stepsize ( $\Delta t$ )                 | <code>STEP</code>     | 5                   |
| Number of repetitions for averaging     | <code>NAVG</code>     | 7                   |
| Vector of number of particles           | <code>NVEC</code>     | 9                   |
| Length of vector of number of particles | <code>NSIM</code>     | 8                   |
| Seed for RNG                            | <code>SEED0</code>    | 14                  |
