# Supplementary material
Source: ML conference proceedings conference paper supplement (https://openreview.net/forum?id=y8zhHLm7FsP)
Supplement: supplementary_material [file attachment]

# README

October 5, 2021

This code runs the EnKF on the linearised cart-pole system, and plots the controlled state when the controller is obtained using ARE and using EnKF.

The code is written in Python 3 and there are two files: `constants_ivp.py`, `ivp.py`. The steps for running the code are as follows:

1. In `constants_ivp.py`, set the desired variables as per the modelling and simulation parameters, see Table 1 and Table 2 respectively for location of these variables in the code.
2. Run `enkf.py`

Table 1: Modelling parameters in `constants_ivp.py`

| Modelling parameter                           | Variable name in code   | Line number in code |
|-----------------------------------------------|-------------------------|---------------------|
| Mass of ball ( $m$ )                          | <code>MASS_BALL</code>  | 11                  |
| Length of rod ( $l$ )                         | <code>LENGTH_ROD</code> | 12                  |
| Gravity ( $g$ )                               | <code>GRAV</code>       | 13                  |
| Mass of cart ( $M$ )                          | <code>MASS_CART</code>  | 14                  |
| Initial condition of $\theta$ ( $\theta(0)$ ) | <code>theta_init</code> | 50                  |
| Initial condition of $x$ ( $x(0)$ )           | <code>dist_init</code>  | 49                  |
| Initial condition of $\omega$ ( $\omega(0)$ ) | <code>omega_init</code> | 52                  |
| Initial condition of $v$ ( $v(0)$ )           | <code>vel_init</code>   | 51                  |

Table 2: Simulation parameters in `constants_ivp.py`

| Modelling parameter           | Variable name in code | Line number in code |
|-------------------------------|-----------------------|---------------------|
| Number of particles ( $N$ )   | <code>N</code>        | 5                   |
| Total simulation time ( $T$ ) | <code>T</code>        | 8                   |
| Stepsize ( $\Delta t$ )       | <code>STEP</code>     | 9                   |
