# Supplementary material
Source: ML conference proceedings conference paper supplement (https://openreview.net/forum?id=y8zhHLm7FsP)
Supplement: supplementary_material [file attachment]

# README

October 5, 2021

This code implements [m21] and plots the error in gain and cost.

The code is written in Python 3 and there are three files: `constants_m21.py`, `m21.py`, `LQSys.py`. The steps for running the code are as follows:

1. In `constants_m21.py`, set the desired variables as per the simulation parameters, see Table 1 respectively for location of these variables in the code.
2. Run `m21.py`



Table 1: Simulation parameters in `constants_m21.py`

| Modelling parameter                 | Variable name in code | Line number in code |
|-------------------------------------|-----------------------|---------------------|
| Total simulation time ( $T$ )       | <code>T</code>        | 4                   |
| Stepsize ( $\Delta t$ )             | <code>STEP</code>     | 5                   |
| Seed for RNG                        | <code>SEED0</code>    | 9                   |
| Gradient descent iterations         | <code>GD_ITER</code>  | 12                  |
| Number of repetitions for averaging | <code>N</code>        | 7                   |
| Gradient descent step ( $\alpha$ )  | <code>NVEC</code>     | 13                  |
| Smoothing parameter ( $r$ )         | <code>NSIM</code>     | 11                  |
| Number of masses ( $d/2$ )          | <code>MASSES</code>   | 15                  |
